# Supplementary material for: Analyses of Catharanthus roseus and Arabidopsis thaliana WRKY transcription factors reveal involvement in jasmonate signaling
Source: PubMed Central journal article supplement (PMC4099484; doi:10.1186/1471-2164-15-502), 2014-06-20

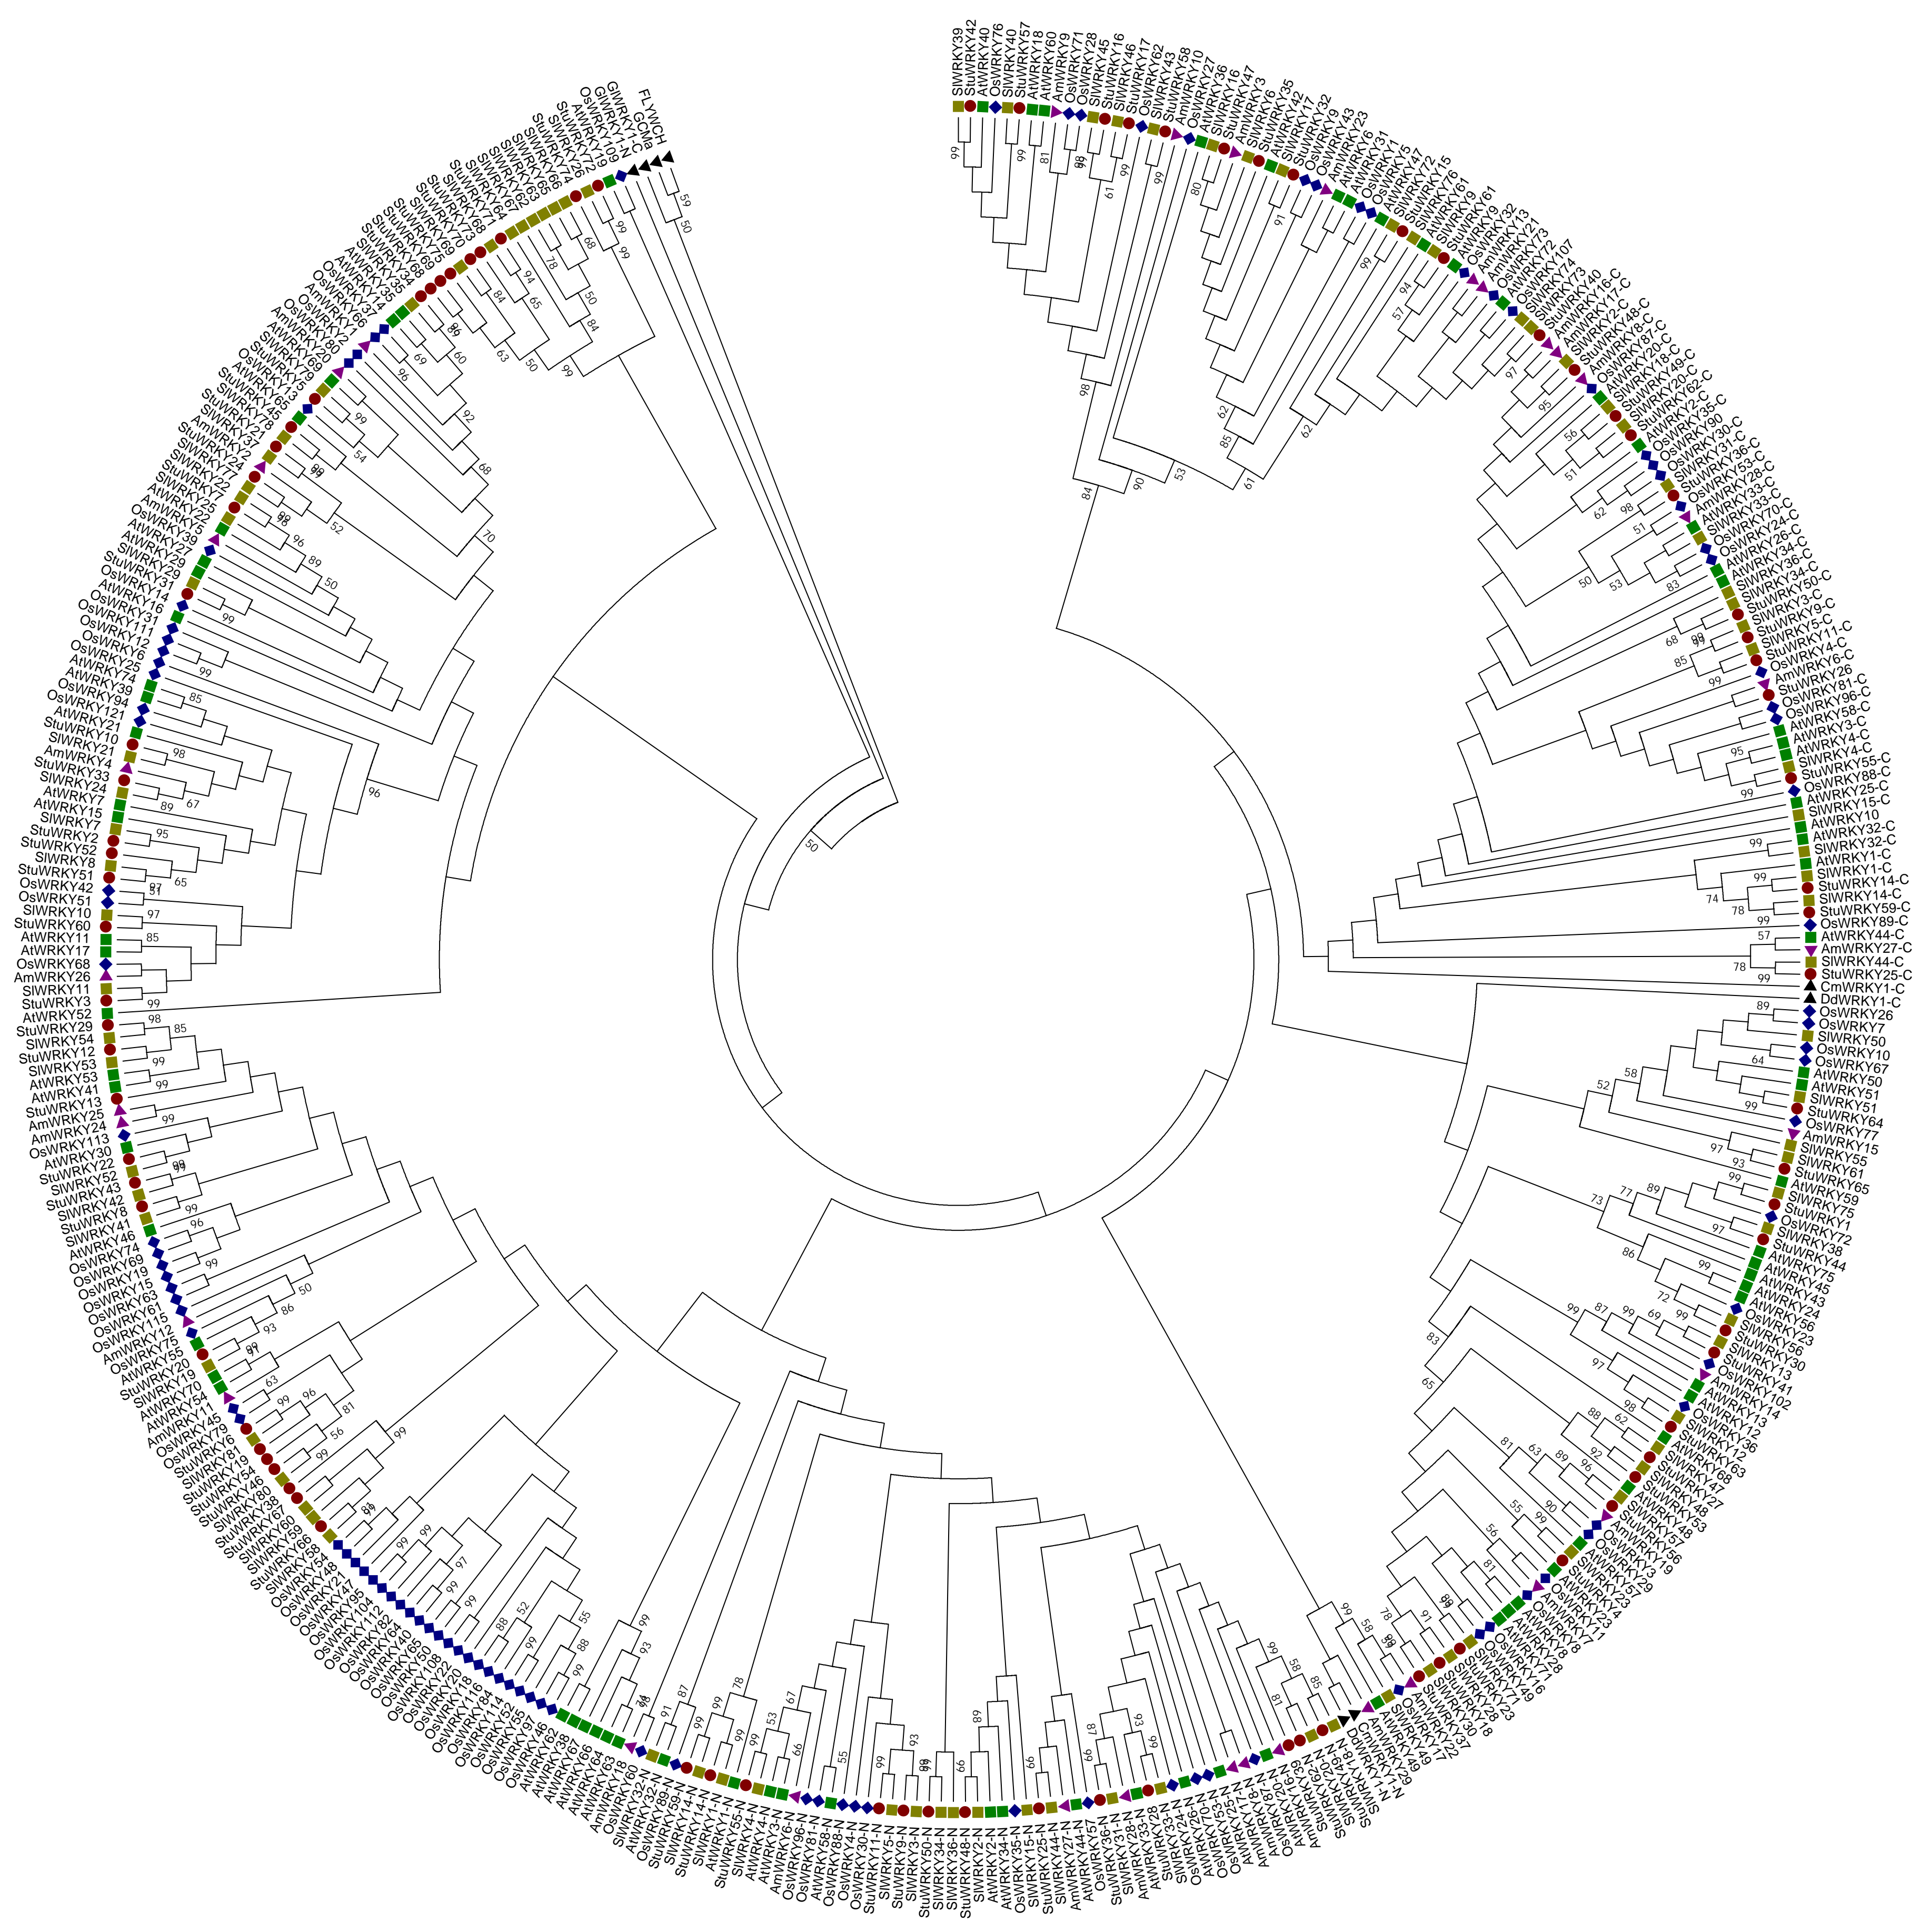

Supplement: 12864_2013_6239_MOESM9_ESM.pdf [file 12864_2013_6239_MOESM9_ESM.pdf]
